# Supplementary material
Source: Elsevier journal article supplement (https://rcastoragev2.blob.core.windows.net/9d2ac3cd75bf371254dc1944530e08d9/mmc1.pdf)
Supplement: mmc1 [file mmc1.pdf]

**Cell Reports, Volume 37**

**Supplemental information**

**Subtractive CRISPR screen identifies  
the ATG16L1/vacuolar ATPase axis  
as required for non-canonical LC3 lipidation**

**Rachel Ulferts, Elena Marcassa, Lewis Timimi, Liam Changwoo Lee, Andrew Daley, Beatriz Montaner, Suzanne Dawn Turner, Oliver Florey, John Kenneth Baillie, and Rupert Beale**

**A**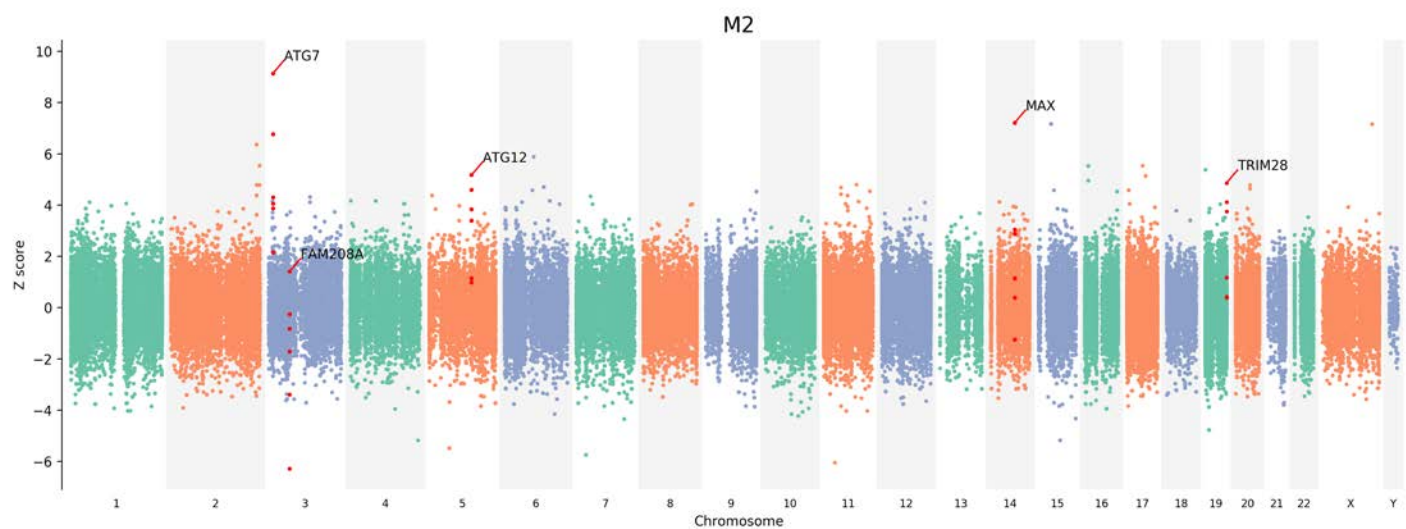**B**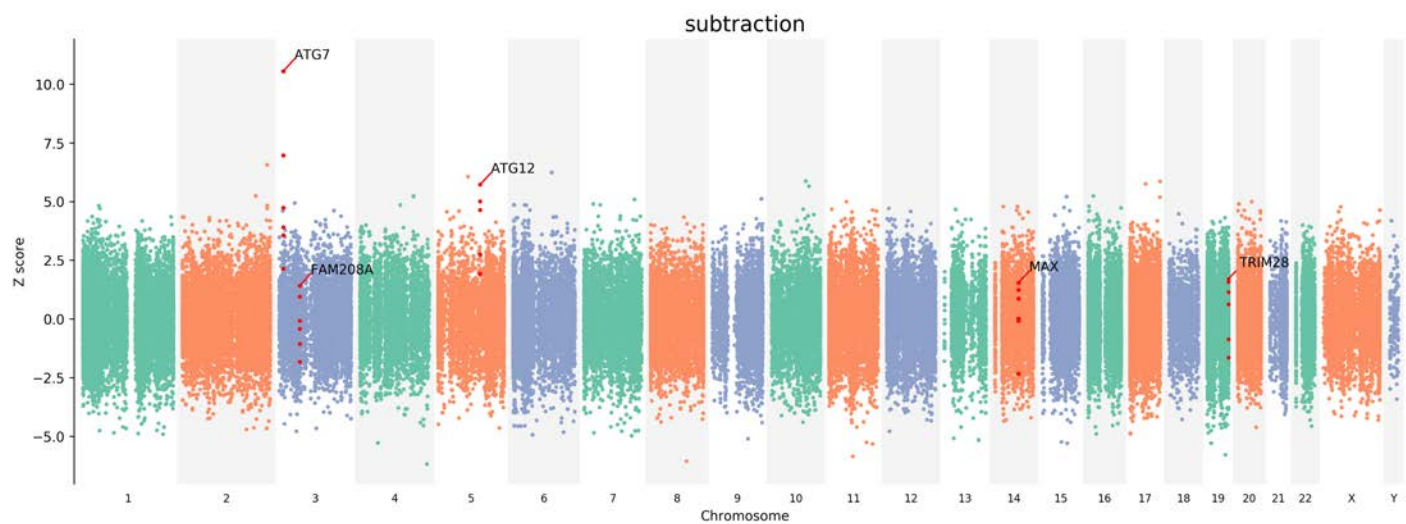

**Figure S1, related to figure 1:** Spatial distribution on the genome of the z-score of sgRNAs the A) permeabilised FACS sort of EGFP-LC3B levels and B) the subtractive analysis of permeabilised and unpermeabilised FACS sorts.

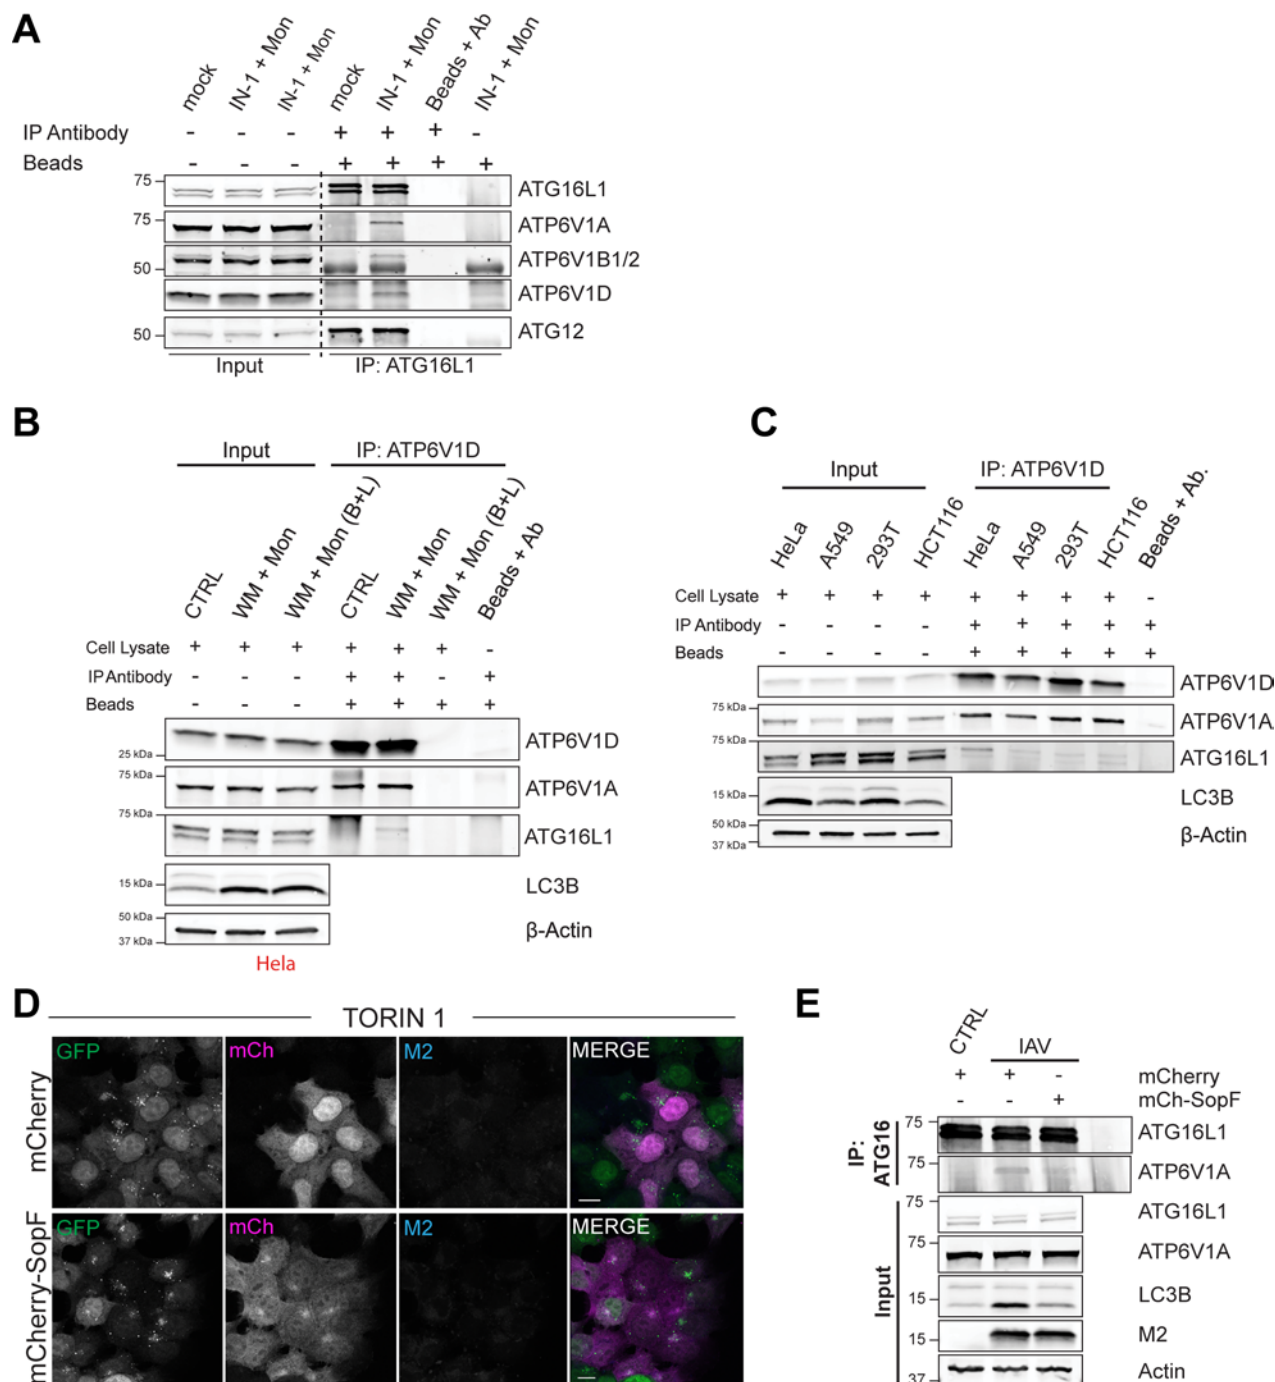

**Figure S2, related to figure 2:** A) Immunoprecipitation analysis of endogenous ATG16L1 in HeLa cells treated with VPS34 IN-1 (pretreatment: 1  $\mu$ M for 30 minutes) followed by monensin (100  $\mu$ M for 1 h). B) Immunoprecipitation analysis of endogenous of ATP6V1D in HeLa cells treated with wortmannin (IN-1 substitute; pretreatment: 100 nM for 30 minutes) followed by monensin (100  $\mu$ M for 1 h). C) Immunoprecipitation analysis of endogenous of ATP6V1D in the indicated cell lines following treatment with VPS34 IN-1 (pretreatment: 1  $\mu$ M for 30 minutes) followed by monensin (100  $\mu$ M for 1 h). D) IF analysis of EGFP-LC3B relocalisation in HCT116 EGFP-LC3B TetON-M2 cells stably expressing mCherry or mCherry-SopF after treatment with Torin 1 (250 nM for 3 h). scale bar 10  $\mu$ m F) Pull down analysis of ATG16L1 interaction with the vATPase in HCT116 EGFP-LC3B cells stably expressing mCherry or mCherry-SopF after infection with PR8 for 16 h.

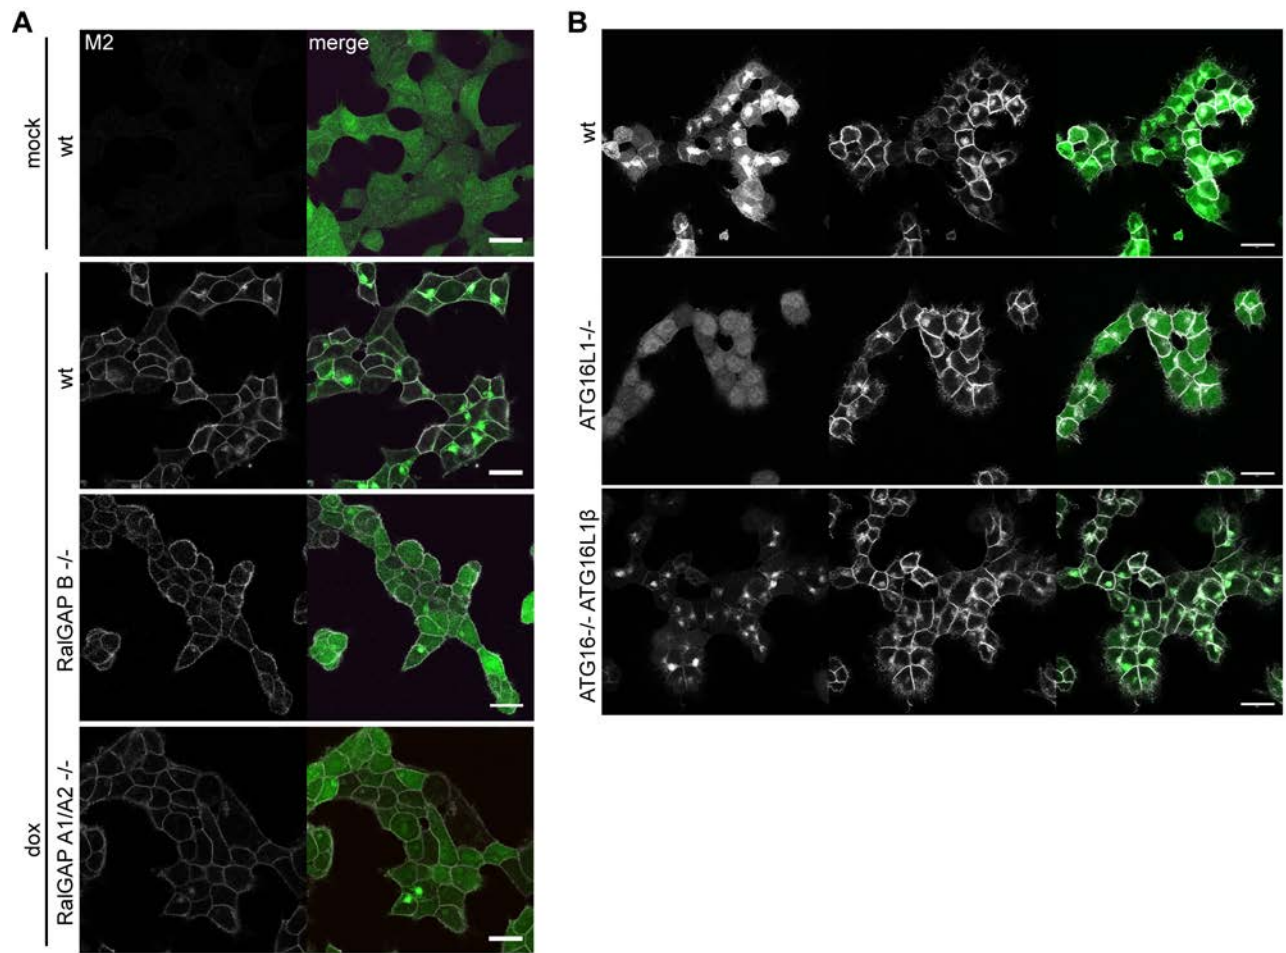

**Figure S3, related to figure 3:** A) IF analysis of M2 localisation in HCT116 EGFP-LC3B TetON-M2 wt or RalGAP A1A2 -/- or RalGAP B -/- cells. M2 expression was induced with 3  $\mu$ g/ml dox for 16 h followed by staining for M2. Scale bar 10  $\mu$ m. B) IF analysis of M2 localisation in HCT116 EGFP-LC3B TetON-M2 wt, ATG16L1 -/- or ATG16L1 -/- reconstituted with hATG16L1 $\beta$  cells treated as in A. Scale bar 10  $\mu$ m.

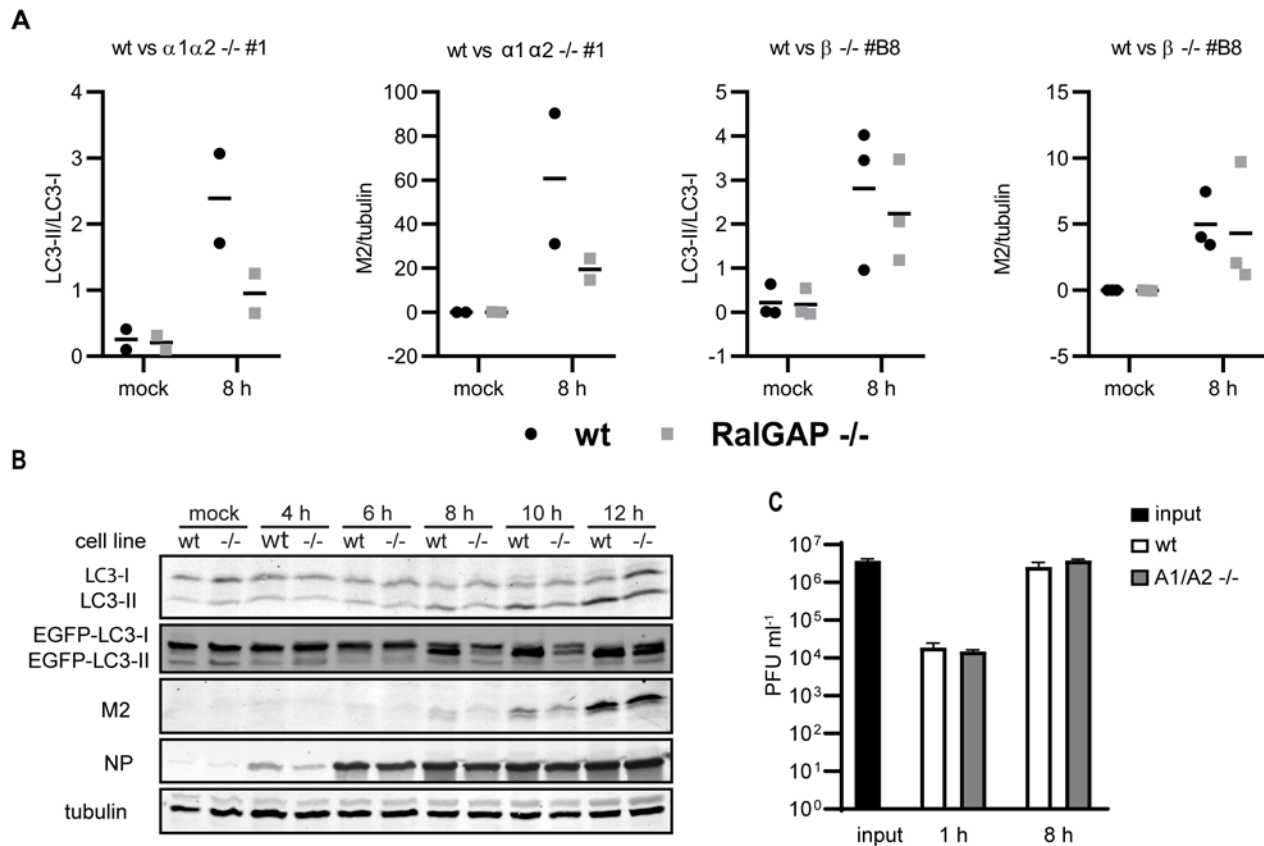

**Figure S4, related to figure 3:** A) Quantification of LC3-lipidation analysis by western blot of HCT116 EGFP-LC3B TetON-M2 cells depleted for RalGAP $\alpha 1\alpha 2$  (panel 1 and 2) or RalGAP $\beta$  (clone B8) after infection with PR8 at an MOI of 10 PFU per cell for 8 h. Graphs show mean of LC3II/LC3I ratio (panels 1 and 3) and M2 expression normalised to tubulin (panels 2 and 4) from two or three independent experiments. B) LC3-lipidation analysis of HCT116 EGFP-LC3B TetON-M2 wt and cells depleted for RalGAP $\alpha 1\alpha 2$  infected with MUD at an MOI of 10 PFU per cell and lysed at the indicated time point p.i.. C) HCT116 EGFP-LC3B TetON-M2 wt or cells depleted for RalGAP $\alpha 1\alpha 2$  were infected at an MOI of 10 PFU per cell. Supernatants were harvested at 1 or 8 h p.i. and titres determined by plaque assay.



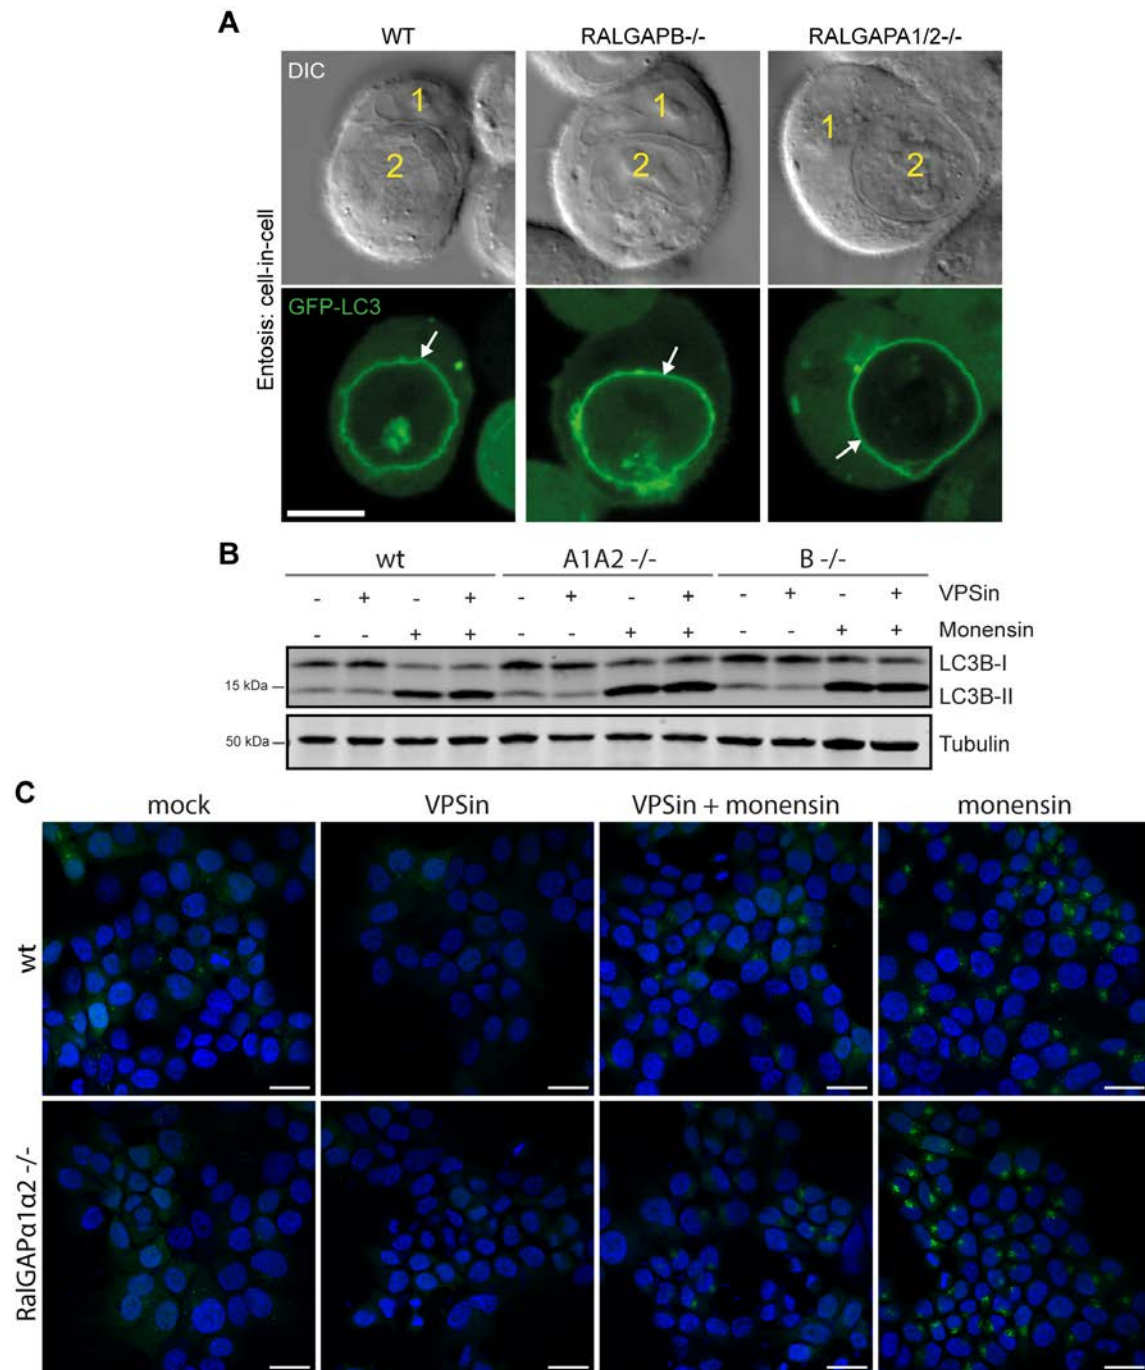

**Figure S5, related to figure 3:** A) EGFP-LC3B recruitment to entotic vesicles in HCT116 EF3P-LC3B TetON M2 wt, RalGAP $\alpha$ 1 $\alpha$ 2<sup>-/-</sup> and RalGAP $\beta$ <sup>-/-</sup> cells analysed by fluorescence (top panel) and bright field (bottom panel) live cell microscopy. Scale bar 10  $\mu$ M. B) LC3 lipidation analysis of HCT116 EF3P-LC3B TetON M2 wt and RalGAP $\alpha$ 1 $\alpha$ 2<sup>-/-</sup> cells after 30 min treatment with 10  $\mu$ M monensin. Where indicated cells were pretreated with 1  $\mu$ M VPSin for 20 min prior to addition of 10  $\mu$ M monensin to inhibit canonical LC3-lipidation. C) Representative images of IF analysis of HCT116 EF3P-LC3B TetON M2 wt and RalGAP $\alpha$ 1 $\alpha$ 2<sup>-/-</sup> treated as in B. Scale bar 20  $\mu$ m.

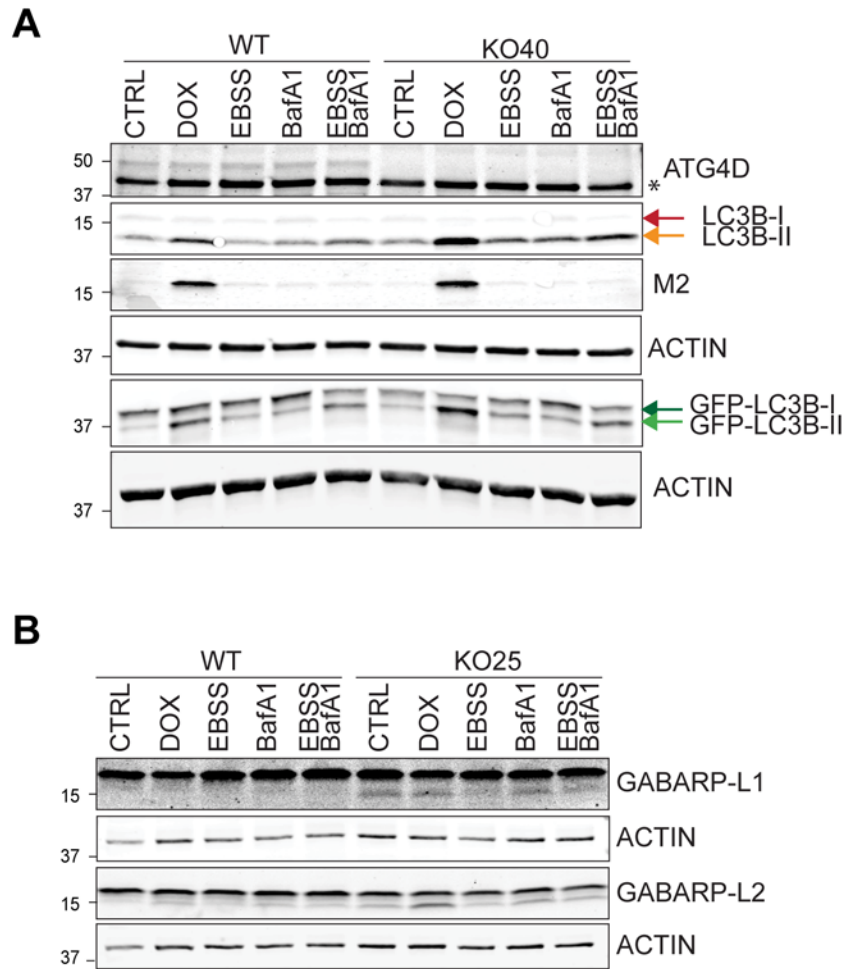

**Figure S6, related to figure 4:** A) HCT116 EGFP-LC3 TetOn-M2 WT and ATG4D KO clone 40 were treated with 10 µg/ml dox for 8 h, 2 hr with EBSS, 1 hr with 200 nM Bafilomycin A1 and a combination of EBSS together with Bafilomycin A1. arrowhead indicates ATG4D specific band, \* background band. B) HCT116 EGFP-LC3 TetOn-M2 WT and ATG4D <sup>-/-</sup> clone 25 were treated as in B and GABARAP-L1 and GABARAP-L2-lipidation analysed by western blot.
